# Supplementary material for: Systematic Review and Meta-Analysis of 12 Randomized Controlled Trials Evaluating the Efficacy of Invasive Radiofrequency Treatment for Knee Pain and Function
Source: Hindawi journal article supplement (doi:10.1155/2019/9037510), 2019-06-26
Supplement: f1 [file 9037510.f1.pdf]

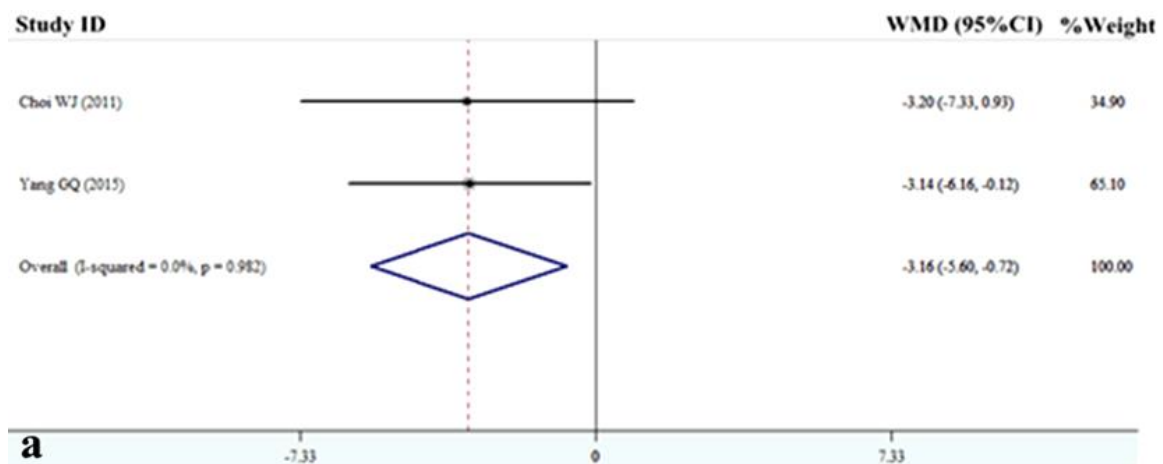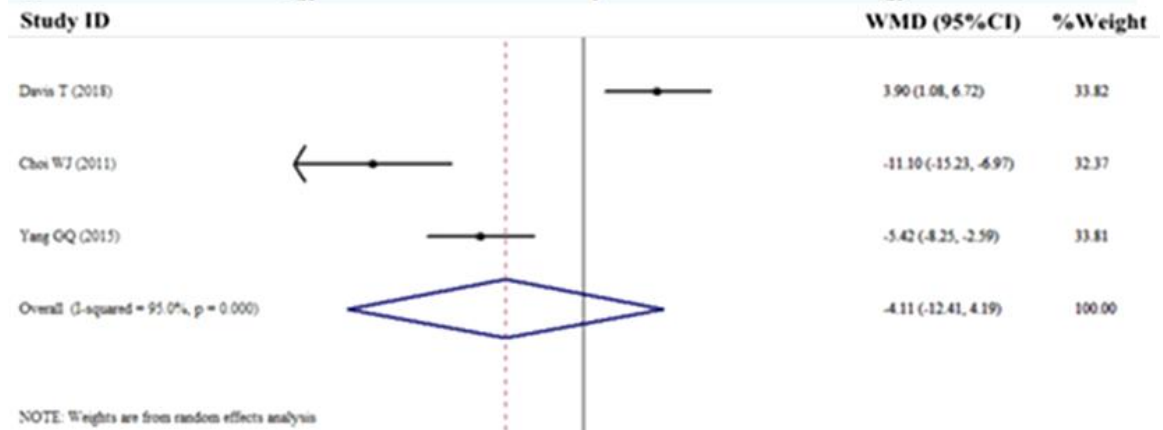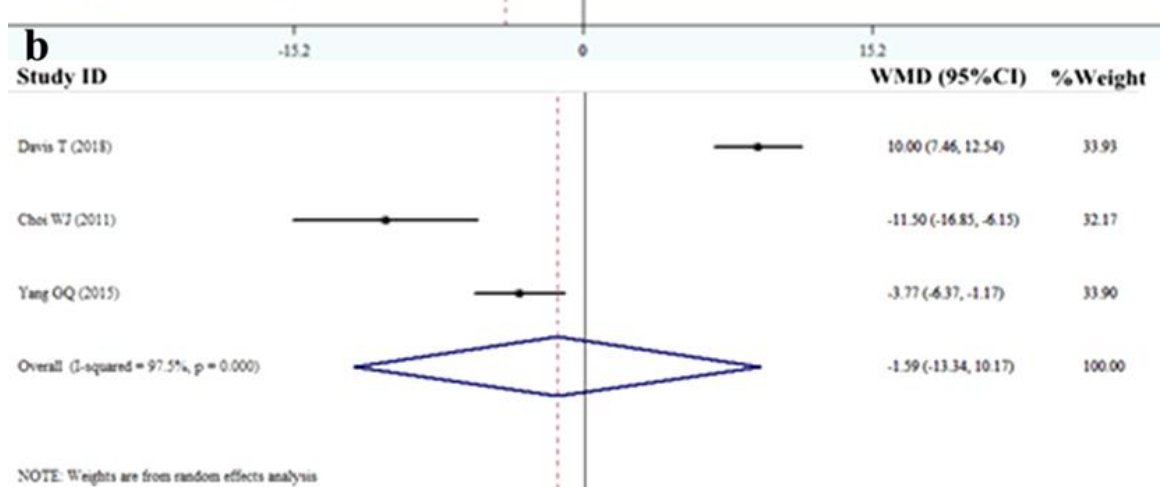

Figure S1. Forest plots for the associations between radiofrequency treatment and OKS scores (a) at 1 week, (b) 1 month, and (c) 3months.

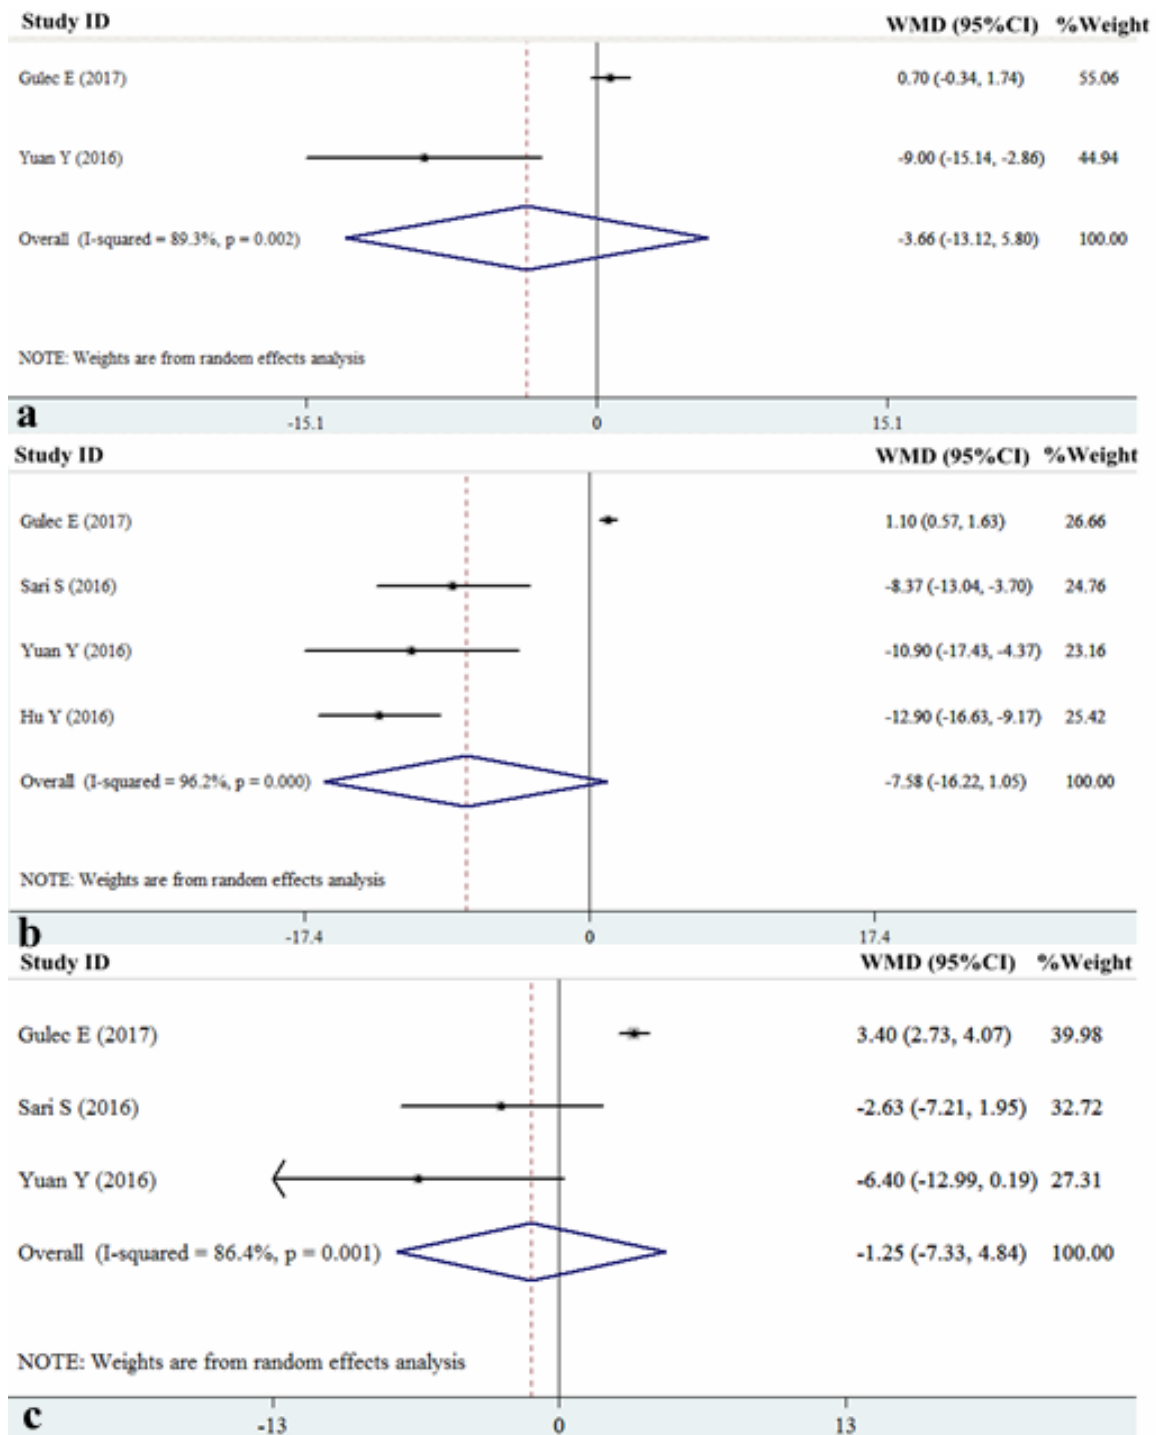

Figure S2. Forest plots for the associations between radiofrequency treatment and WOMAC scores (a) at 1 week, (b) 1 month, and (c) 3months.

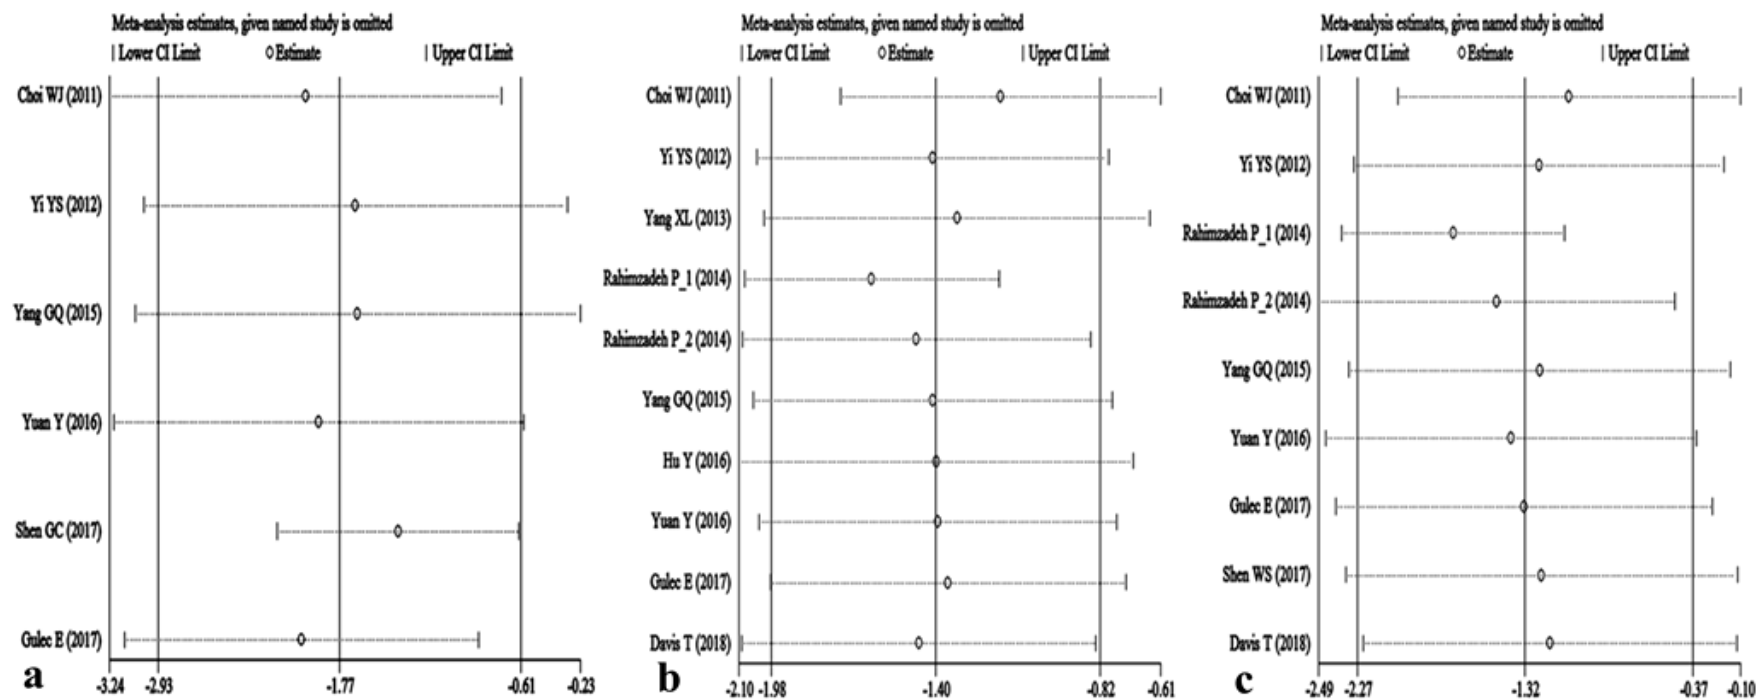

Figure S3. Sensitivity analysis for the associations between radiofrequency treatment and VAS scores (a) at 1 week, (b) 1 month, and (c) 3 months.
